# Supplementary material for: The sensitivity of aerosol in Europe to two different emission inventories and temporal distribution of emissions
Source: Copernicus journal article supplement (doi:10.5194/acp-6-4287-2006), 2006-09-25
Supplement: Supplementary file 1 [file acp-6-4287-2006-supplement.pdf]

Electronic supplement to the paper, The sensitivity of aerosol in Europe to two different emission inventories and temporal distribution of emissions, A. de Meij, M. Krol, F. Dentener, E. Vignati, C. Cuvelier, P. Thunis.

Table S1. Density and optical properties of aerosol species.

| Species                                                             | Density<br>g/cm <sup>3</sup> | Refractive index |           |
|---------------------------------------------------------------------|------------------------------|------------------|-----------|
|                                                                     |                              | real             | imaginary |
| Aerosol water <sup>1)</sup>                                         | 1.0                          | 1.33             | 1.75e-7   |
| (NH <sub>4</sub> ) <sub>2</sub> SO <sub>4</sub> <sup>2)</sup> (dry) | 1.76                         | 1.53             | 1.0e-8    |
| NH <sub>4</sub> NO <sub>3</sub> <sup>2)</sup> (dry)                 | 1.70                         | 1.53             | 1.0e-8    |
| Organics <sup>3)</sup>                                              | 1.50                         | 1.53             | 5.8e-3    |
| Dust <sup>4)</sup>                                                  | 2.5                          | 1.515            | 3.9e-3    |
| Black carbon <sup>5)</sup>                                          | 1.50                         | 1.75             | 4.4e-1    |
| Sea salt <sup>6)</sup> (dry)                                        | 2.00                         | 1.49             | 1.0e-8    |

1) Downing and Williams 1975.

2) Lowenthal et al., 2000.

3) Provided by S. Kinne (personal communication, 2004)

4) M. Werner, based on Sokolik and Toon, 1999.

5) Hess et al., 1998.

6) Shettle and Fenn, 1979

Table S2. Overview list of species included in the two emission inventories EMEP and AEROCOM.

| EMEP emission inventory                            | AEROCOM emission inventory               |
|----------------------------------------------------|------------------------------------------|
| PM coarse (emitted as dust)                        | POM                                      |
| PM2.5 (emitted as dust, BC, POM, SO <sub>4</sub> ) | BC                                       |
| SO <sub>x</sub> (given as SO <sub>2</sub> )        | SO <sub>2</sub>                          |
| NO <sub>x</sub> (given as NO <sub>2</sub> )        | Mineral dust (2 lognormal distributions) |
| NH <sub>3</sub>                                    | Sea salt (3 lognormal distributions)     |
| NM VOC                                             | SOA (secondary organic aerosol)          |
| CO                                                 | NO <sub>x</sub> (given as NO)            |
|                                                    | NH <sub>3</sub>                          |
|                                                    | NM VOC                                   |
|                                                    | CO                                       |

Table S3. Overview CORINAIR source sectors together with the emissions with the largest contribution per sector, given in percentage of the total over all the sectors.

| Source category                                       | SO <sub>2</sub> | NO <sub>x</sub> | NH <sub>3</sub> | NMVOC | CO  |
|-------------------------------------------------------|-----------------|-----------------|-----------------|-------|-----|
| 1. Combustion in energy and transformation industries | 52%             | 20%             |                 |       |     |
| 2. Non-industrial combustion plants                   |                 |                 |                 |       | 18% |
| 3. Combustion in manufacturing industry               | 13%             |                 |                 |       | 10% |
| 4. Production processes                               |                 |                 |                 |       |     |
| 5. Extraction fossil fuel                             |                 |                 |                 |       |     |
| 6. Solvents                                           |                 |                 |                 | 30%   |     |
| 7. Road transport                                     |                 | 34%             |                 | 35%   | 52% |
| 8. Other mobile sources and machinery                 | 12%             | 30%             |                 |       |     |
| 9. Waste treatment and disposal                       |                 |                 |                 |       |     |
| 10. Agriculture                                       |                 |                 | 93%             |       |     |
| 11. Nature                                            | 11%             |                 |                 |       |     |

Table S4. Distribution of gas and aerosols in the EMEP emission inventory according to different height levels based on the source sector.

| Source category                                       | Height emission gases |       |       |      | Height emission aerosols |       |       |      |
|-------------------------------------------------------|-----------------------|-------|-------|------|--------------------------|-------|-------|------|
|                                                       | ground                | ~150m | ~250m | high | ground                   | ~150m | ~250m | high |
| 1. Combustion in energy and transformation industries |                       |       | 8%    | 92%  | 20%                      | 20%   | 40%   | 20%  |
| 2. Non-industrial combustion plants                   | 50%                   | 50%   |       |      | 100%                     |       |       |      |
| 3. combustion in manufacturing industry               | 50%                   | 50%   |       |      | 70%                      | 7.5%  | 15%   | 7.5% |
| 4. Production processes                               | 90%                   | 10%   |       |      | 100%                     |       |       |      |
| 5. Extraction fossil fuel                             | 90%                   | 10%   |       |      | 20%                      | 20%   | 40%   | 20%  |
| 6. Solvents                                           | 100%                  |       |       |      | 100%                     |       |       |      |
| 7. Road transport                                     | 100%                  |       |       |      | 100%                     |       |       |      |
| 8. Other mobile sources and machinery                 | 100%                  |       |       |      | 100%                     |       |       |      |
| 9. Waste treatment and disposal                       | 80%                   | 20%   |       |      | 100%                     |       |       |      |
| 10. Agriculture                                       | 100%                  |       |       |      | 100%                     |       |       |      |
| 11. Nature                                            | 100%                  |       |       |      | 100%                     |       |       |      |

Table S5. Distribution of the AEROCOM emissions according to different heights in the model.

| Component                                | Height                                                                                                                                                                                                               |
|------------------------------------------|----------------------------------------------------------------------------------------------------------------------------------------------------------------------------------------------------------------------|
| Dust                                     | Lowest model layer                                                                                                                                                                                                   |
| Sea salt                                 | Lowest model layer                                                                                                                                                                                                   |
| DMS                                      | Lowest model layer                                                                                                                                                                                                   |
| SOA                                      | Lowest model layer                                                                                                                                                                                                   |
| POM/BC/biofuel                           | Lowest model layer                                                                                                                                                                                                   |
| POM/BC fossilfuel                        | Lowest model layer                                                                                                                                                                                                   |
| Biomass burning<br>OC/BC/SO <sub>2</sub> | 6 levels, 0.0 – 0.1km; 0.1 – 0.5km; 0.5 – 1.0km; 1.0 – 2.0km; 2.0 – 3.0km; 3.0 – 6.0km                                                                                                                               |
| SO <sub>2</sub> /NO <sub>x</sub>         | Domestic, <100m<br>Road, off-road, <100m<br>Industry, 100 - 300m<br>Shipping, <100m<br>Power-plants, 100 – 300m<br>Volcanic - continuous: 2/3 to 1/1 of volcano top*<br>- explosive: 0.5 to 1.5km above volcano top* |

\*Height boundaries provided from Halmer et al., 2002.

Table S6. Overview of emissions in EMEP and AEROCOM emission inventory, for June and December and the year 2000 for Europe, spanning from 21° W to 39° E and from 12° S to 66° N. Emissions are given in Tg.

| Species (Tg)    | AERO June | EMEP June | Ratio June | AERO Dec. | EMEP Dec. | Ratio Dec. | AERO 2000 | EMEP 2000 | Ratio 2000 |
|-----------------|-----------|-----------|------------|-----------|-----------|------------|-----------|-----------|------------|
| NO <sub>x</sub> | 0.61      | 0.44      | 1.39       | 0.50      | 0.48      | 1.03       | 6.45      | 5.55      | 1.16       |
| CO              | 4.16      | 3.87      | 1.07       | 4.30      | 4.79      | 0.90       | 51.2      | 53.3      | 0.96       |
| SO <sub>2</sub> | 0.93      | 0.79      | 1.18       | 0.96      | 0.99      | 0.98       | 11.4      | 10.58     | 1.07       |
| NH <sub>3</sub> | 0.63      | 0.38      | 1.67       | 0.36      | 0.30      | 1.21       | 6.01      | 4.40      | 1.37       |
| SO <sub>4</sub> | 0.02      | 0.01      | 1.31       | 0.02      | 0.02      | 0.92       | 0.23      | 0.22      | 1.03       |
| Sea salt        | 4.06      | 4.06      | 1.00       | 11.7      | 11.7      | 1.00       | 87.2      | 87.2      | 1.00       |
| BC              | 0.05      | 0.04      | 1.02       | 0.05      | 0.06      | 0.71       | 0.55      | 0.69      | 0.81       |
| POM             | 0.18      | 0.07      | 2.48       | 0.10      | 0.09      | 1.05       | 1.72      | 1.18      | 1.45       |
| Dust            | 0.23      | 0.36      | 0.65       | 0.26      | 0.43      | 0.59       | 3.71      | 5.58      | 0.66       |

Table S7. Overview of the AERONET stations, together with their geographical location, the height of the stations and the number of days for which AOD data is available.

| AERONET station  | Altitude (m) | Latitude | Longitude | Number of days |               |
|------------------|--------------|----------|-----------|----------------|---------------|
|                  |              |          |           | June 2000      | December 2000 |
| Creteil          | 57           | 48.78    | 2.43      | -              | 4             |
| Lampedusa        | 45           | 35.51    | 12.62     | -              | -             |
| Lille            | 60           | 50.6     | 3.13      | 13             | 7             |
| Bucarest         | 44           | 44.45    | 26.52     | -              | 9             |
| Clermont_Ferrand | 1464         | 45.75    | 2.95      | 1              | -             |
| El_Arenosillo    | 0            | 37.1     | -5.26     | 29*            | -             |
| Hamburg          | 105          | 53.56    | 9.96      | 7              | -             |
| Helgoland        | 33           | 54.16    | 7.88      | 1              | -             |
| IMC_Oristano     | 10           | 39.9     | 8.5       | 27*            | 14            |
| Modena           | 56           | 44.61    | 10.93     | -              | -             |
| Palaiseau        | 156          | 48.7     | 2.2       | 12             | -             |
| Toulouse         | 150          | 43.55    | 1.46      | -              | 11            |
| Venice           | 10           | 45.3     | 12.5      | 30             | 9             |
| Avignon          | 32           | 43.91    | 4.86      | 26*            | 14            |
| Gotland          | 10           | 57.91    | 18.93     | 2              | -             |
| Ispra            | 235          | 45.8     | 8.6       | 24*            | -             |
| Moldova          | 205          | 47       | 28.8      | 25*            | -             |

\* Stations used for analysis

Table S8. Overview of stations used in this work

| Code | Station name     | Lat. | Lon. | Altitude m | Code | Station name     | Lat. | Lon. | Altitude m |
|------|------------------|------|------|------------|------|------------------|------|------|------------|
| AT02 | Illmitz          | 47N  | 16E  | 117        | GB15 | Strath Vaich Dam | 57N  | 4W   | 270        |
| BE01 | Offagne          | 49N  | 5E   | 430        | GB16 | Glen Dye         | 56N  | 2W   | 85         |
| BE32 | Eupen            | 50N  | 6E   | 295        | GB36 | Harwell          | 51N  | 1W   | 137        |
| BE35 | Vezin            | 50N  | 4E   | 160        | GB37 | Ladybower Res.   | 53N  | 1W   | 420        |
| CH02 | Payerne          | 46N  | 6E   | 510        | GB38 | Lullington Heath | 50N  | 0E   | 120        |
| CH03 | Tänikon          | 47N  | 8E   | 540        | GB43 | Narberth         | 51N  | 4W   | 160        |
| CH05 | Rigi             | 47N  | 8E   | 1030       | GB45 | Wicken Fen       | 52N  | 0W   | 5          |
| DK03 | Tange            | 56N  | 9E   | 13         | HU02 | K-pusza          | 46N  | 19E  | 125        |
|      | San Pablo de     |      |      |            |      |                  |      |      |            |
| ES01 | los Montes       | 39N  | 4W   | 917        | IE03 | The Burren       | 53N  | 9W   | 90         |
| ES04 | Logroño          | 42N  | 2W   | 445        | IE04 | Ridge of Capard  | 53N  | 7W   | 340        |
| ES08 | Niembro          | 43N  | 4W   | 134        | IT01 | Montelibretti    | 42N  | 12E  | 48         |
| ES09 | Campisabalos     | 41N  | 3W   | 1360       | IT04 | Ispra            | 45N  | 8E   | 209        |
| ES10 | Cabo de Creus    | 41N  | 3W   | 23         | LT15 | Preila           | 55N  | 21E  | 5          |
| ES11 | Barcarrola       | 38N  | 6W   | 393        | LV10 | Rucava           | 56N  | 21E  | 5          |
| ES12 | Zarra            | 39N  | 1W   | 885        | LV16 | Zoseni           | 57N  | 25E  | 183        |
| ES13 | Penausende       | 41N  | 5W   | 985        | NL09 | Kollumerwaard    | 53N  | 6E   | 1          |
| ES15 | Risco Llamo      | 39N  | 4W   | 1241       | NL10 | Vredepeel        | 51N  | 5E   | 28         |
| FI09 | Utö              | 59N  | 21E  | 7          | NO01 | Birkenes         | 58N  | 8E   | 190        |
| FI17 | Virolahti II     | 60N  | 27E  | 4          | NO08 | Skreådalen       | 58N  | 6E   | 475        |
| FI37 | Ahtari II        | 62N  | 24E  | 180        | NO39 | Kårvatn          | 62N  | 8E   | 210        |
| FR03 | La Crouzille     | 45N  | 1E   | 497        | NO41 | Osen             | 61N  | 11E  | 440        |
| FR05 | La Hague         | 49N  | 1W   | 133        | PL02 | Jarczew          | 51N  | 21E  | 180        |
| FR09 | Revin            | 49N  | 4E   | 390        | PL04 | Leba             | 54N  | 17E  | 2          |
| FR10 | Morvan           | 47N  | 4E   | 620        | PL05 | Diabla Gora      | 54N  | 22E  | 157        |
| FR13 | Peyrusse Vieille | 43N  | 0E   | 236        | RU16 | Shepeljovo       | 59N  | 29E  | 4          |
| GB02 | Eskdalemuir      | 55N  | 3W   | 243        | RU18 | Danki            | 54N  | 37E  | 150        |
| GB04 | Stoke Ferry      | 52N  | 0E   | 15         | SE02 | Rörvik           | 57N  | 11E  | 10         |
| GB06 | Lough Navar      | 54N  | 7W   | 126        | SK04 | Stará Lesná      | 49N  | 20E  | 808        |
| GB07 | Barcombe Mills   | 50N  | 0W   | 8          | SK05 | Liesek           | 49N  | 19E  | 892        |
| GB13 | Yarner Wood      | 50N  | 3W   | 119        | TR01 | Cubuk II         | 40N  | 33E  | 1169       |
| GB14 | High Muffles     | 54N  | 0W   | 267        | YU05 | Kamenicki vis    | 43N  | 21E  | 813        |

Table S9a. Monthly mean of SO<sub>2</sub> by S<sub>EMEP</sub>, S<sub>AERO</sub> and measurement data, together with the temporal correlation coefficient and the number of measurements for June 2000.

| SO <sub>2</sub> ppb<br>Station<br>name | June                      |      |                           |      |           |                   |
|----------------------------------------|---------------------------|------|---------------------------|------|-----------|-------------------|
|                                        | S <sub>EMEP</sub><br>mean | r    | S <sub>AERO</sub><br>mean | r    | EMEP data | #<br>measurements |
| FI37                                   | 0.12                      | 0.95 | 0.27                      | 0.87 | 0.11      | 29                |
| GB06                                   | 0.23                      | 0.62 | 0.33                      | 0.66 | 0.15      | 28                |
| GB13                                   | 0.7                       | 0.84 | 1.02                      | 0.74 | 0.39      | 27                |
| GB16                                   | 0.16                      | 0.64 | 0.39                      | 0.62 | 0.24      | 29                |
| IT04                                   | 0.55                      | 0.67 | 2.71                      | 0.69 | 0.96      | 17                |
| NL10                                   | 2.01                      | 0.89 | 2.05                      | 0.53 | 1.09      | 28                |
| NO01                                   | 0.09                      | 0.67 | 0.52                      | 0.86 | 0.14      | 29                |
| NO08                                   | 0.17                      | 0.52 | 0.23                      | 0.64 | 0.09      | 29                |
| SE08                                   | 0.56                      | 0.76 | 1.65                      | 0.76 | 0.40      | 29                |
| Average                                | 0.51                      | 0.73 | 1.02                      | 0.71 | 0.40      |                   |

Table S9b. Monthly mean of SO<sub>2</sub> by S<sub>EMEP</sub>, S<sub>AERO</sub> and measurement data, together with the temporal correlation coefficient and the number of measurements for December 2000.

| SO <sub>2</sub> ppb<br>Station<br>name | December                  |      |                           |      |           |                   |
|----------------------------------------|---------------------------|------|---------------------------|------|-----------|-------------------|
|                                        | S <sub>EMEP</sub><br>mean | r    | S <sub>AERO</sub><br>mean | r    | EMEP data | #<br>measurements |
| AT02                                   | 2.46                      | 0.63 | 2.83                      | 0.69 | 1.57      | 30                |
| DK03                                   | 0.60                      | 0.56 | 0.86                      | 0.55 | 0.23      | 30                |
| FI17                                   | 0.31                      | 0.63 | 0.55                      | 0.59 | 0.73      | 30                |
| FI37                                   | 0.23                      | 0.54 | 0.37                      | 0.75 | 0.20      | 30                |
| GB06                                   | 0.42                      | 0.90 | 0.40                      | 0.84 | 0.24      | 30                |
| GB13                                   | 0.65                      | 0.85 | 0.86                      | 0.77 | 0.37      | 30                |
| GB15                                   | 0.41                      | 0.64 | 0.57                      | 0.64 | 0.20      | 30                |
| NL10                                   | 2.58                      | 0.65 | 2.45                      | 0.54 | 1.58      | 30                |
| PL02                                   | 4.54                      | 0.73 | 6.92                      | 0.55 | 2.88      | 30                |
| PL05                                   | 2.34                      | 0.71 | 3.33                      | 0.59 | 1.14      | 29                |
| SE08                                   | 0.80                      | 0.74 | 1.43                      | 0.53 | 0.48      | 30                |
| YU05                                   | 5.71                      | 0.63 | 9.02                      | 0.71 | 7.20      | 26                |
| Average                                | 1.75                      | 0.68 | 2.47                      | 0.65 | 1.40      |                   |

Table S10a. Monthly mean of NO<sub>x</sub> by S<sub>EMEP</sub>, S<sub>AERO</sub> and measurement data, together with the temporal correlation coefficient and the number of measurements for June 2000.

| NO <sub>x</sub> ppb<br>Station<br>name | June                      |      |                           |      |                   |                   |
|----------------------------------------|---------------------------|------|---------------------------|------|-------------------|-------------------|
|                                        | S <sub>EMEP</sub><br>mean | r    | S <sub>AERO</sub><br>mean | r    | EMEP data<br>mean | #<br>measurements |
| AT02                                   | 2.68                      | 0.56 | 5.50                      | 0.58 | 3.06              | 28                |
| BE35                                   | 11.36                     | 0.56 | 12.80                     | 0.55 | 8.09              | 29                |
| CH03                                   | 4.82                      | 0.67 | 9.63                      | 0.63 | 5.11              | 27                |
| GB36                                   | 8.94                      | 0.89 | 14.03                     | 0.90 | 5.85              | 29                |
| GB37                                   | 4.05                      | 0.66 | 7.71                      | 0.65 | 6.81              | 23                |
| GB38                                   | 12.82                     | 0.81 | 11.59                     | 0.62 | 5.45              | 28                |
| GB43                                   | 1.26                      | 0.91 | 1.87                      | 0.86 | 1.99              | 19                |
| NL09                                   | 3.72                      | 0.89 | 13.72                     | 0.79 | 3.41              | 27                |
| NO01                                   | 0.54                      | 0.71 | 3.68                      | 0.70 | 0.62              | 29                |
| PL04                                   | 1.51                      | 0.50 | 7.74                      | 0.60 | 1.53              | 29                |
| SE02                                   | 2.72                      | 0.66 | 12.41                     | 0.51 | 1.84              | 29                |
| Average                                | 4.95                      | 0.71 | 9.15                      | 0.67 | 3.98              |                   |

Table S10b. Monthly mean of NO<sub>x</sub> by S<sub>EMEP</sub>, S<sub>AERO</sub> and measurement data, together with the temporal correlation coefficient and the number of measurements for December 2000.

| NO <sub>x</sub> ppb<br>Station<br>name | December                  |      |                           |      |                   |                   |
|----------------------------------------|---------------------------|------|---------------------------|------|-------------------|-------------------|
|                                        | S <sub>EMEP</sub><br>mean | r    | S <sub>AERO</sub><br>mean | r    | EMEP data<br>mean | #<br>measurements |
| AT02                                   | 8.27                      | 0.59 | 8.32                      | 0.72 | 7.76              | 30                |
| BE01                                   | 7.36                      | 0.61 | 5.36                      | 0.56 | 8.28              | 26                |
| BE32                                   | 13.19                     | 0.66 | 10.03                     | 0.62 | 7.83              | 30                |
| BE35                                   | 15.27                     | 0.72 | 12.47                     | 0.71 | 11.45             | 30                |
| CH05                                   | 11.72                     | 0.56 | 9.70                      | 0.57 | 4.53              | 28                |
| GB37                                   | 4.37                      | 0.83 | 6.34                      | 0.94 | 8.86              | 27                |
| GB38                                   | 9.11                      | 0.89 | 8.70                      | 0.61 | 7.37              | 25                |
| GB43                                   | 2.68                      | 0.84 | 2.79                      | 0.80 | 5.75              | 29                |
| GB45                                   | 12.81                     | 0.69 | 17.28                     | 0.60 | 11.71             | 30                |
| IT01                                   | 7.46                      | 0.72 | 8.76                      | 0.67 | 5.87              | 30                |
| LT15                                   | 2.52                      | 0.75 | 4.29                      | 0.64 | 5.16              | 30                |
| NL09                                   | 7.95                      | 0.82 | 10.62                     | 0.72 | 9.61              | 30                |
| NO08                                   | 1.04                      | 0.76 | 1.53                      | 0.58 | 0.83              | 30                |
| NO41                                   | 0.82                      | 0.84 | 1.71                      | 0.63 | 1.10              | 30                |
| PL05                                   | 3.40                      | 0.62 | 6.33                      | 0.63 | 3.59              | 29                |
| SE08                                   | 2.33                      | 0.88 | 4.25                      | 0.78 | 2.73              | 30                |
| SK05                                   | 5.44                      | 0.64 | 2.49                      | 0.61 | 5.32              | 30                |
| Average                                | 6.81                      | 0.73 | 7.12                      | 0.67 | 6.34              |                   |

Table S11a. Monthly mean of  $\text{SO}_4^-$  by  $S_{\text{EMEP}}$ ,  $S_{\text{AERO}}$  and measurement data, together with the temporal correlation coefficient and the number of measurements for June 2000.

| SO <sub>4</sub> ppb<br>Station<br>name | JUNE                      |      |                           |      |                   |                   |
|----------------------------------------|---------------------------|------|---------------------------|------|-------------------|-------------------|
|                                        | S <sub>EMEP</sub><br>mean | r    | S <sub>AERO</sub><br>mean | r    | EMEP data<br>mean | #<br>measurements |
| AT02                                   | 1.38                      | 0.66 | 1.67                      | 0.61 | 0.91              | 29                |
| CH05                                   | 1.03                      | 0.62 | 1.17                      | 0.60 | 0.74              | 27                |
| ES04                                   | 1.02                      | 0.78 | 0.90                      | 0.72 | 1.33              | 25                |
| ES08                                   | 0.70                      | 0.88 | 0.76                      | 0.82 | 1.85              | 28                |
| ES11                                   | 0.77                      | 0.65 | 0.79                      | 0.60 | 0.97              | 29                |
| FI09                                   | 0.29                      | 0.76 | 0.60                      | 0.62 | 0.39              | 29                |
| FI17                                   | 0.33                      | 0.84 | 0.46                      | 0.78 | 0.43              | 29                |
| FI37                                   | 0.25                      | 0.84 | 0.30                      | 0.81 | 0.30              | 24                |
| FR05                                   | 0.67                      | 0.66 | 0.75                      | 0.75 | 0.87              | 25                |
| FR09                                   | 0.73                      | 0.76 | 0.70                      | 0.74 | 0.86              | 25                |
| FR10                                   | 0.71                      | 0.67 | 0.71                      | 0.69 | 0.57              | 29                |
| FR13                                   | 0.77                      | 0.74 | 0.66                      | 0.75 | 0.71              | 29                |
| GB02                                   | 0.34                      | 0.83 | 0.39                      | 0.81 | 0.45              | 29                |
| GB04                                   | 0.62                      | 0.69 | 0.67                      | 0.69 | 0.83              | 29                |
| GB06                                   | 0.34                      | 0.89 | 0.41                      | 0.89 | 0.42              | 28                |
| GB07                                   | 0.76                      | 0.76 | 0.91                      | 0.77 | 0.81              | 29                |
| GB13                                   | 0.54                      | 0.94 | 0.62                      | 0.91 | 0.61              | 27                |
| GB14                                   | 0.46                      | 0.91 | 0.58                      | 0.90 | 0.62              | 28                |
| GB15                                   | 0.16                      | 0.61 | 0.18                      | 0.62 | 0.23              | 29                |
| GB16                                   | 0.23                      | 0.74 | 0.26                      | 0.74 | 0.35              | 29                |
| HU02                                   | 1.36                      | 0.69 | 1.94                      | 0.73 | 1.05              | 27                |
| IE03                                   | 0.39                      | 0.89 | 0.57                      | 0.81 | 0.36              | 25                |
| IE04                                   | 0.41                      | 0.80 | 0.44                      | 0.77 | 0.27              | 29                |
| LT15                                   | 0.42                      | 0.83 | 0.57                      | 0.89 | 0.48              | 29                |
| NL09                                   | 0.50                      | 0.84 | 0.57                      | 0.84 | 0.51              | 25                |
| NL10                                   | 0.79                      | 0.56 | 0.71                      | 0.66 | 0.55              | 26                |
| NO01                                   | 0.29                      | 0.92 | 0.37                      | 0.93 | 0.51              | 29                |
| NO08                                   | 0.29                      | 0.81 | 0.30                      | 0.92 | 0.43              | 29                |
| NO39                                   | 0.11                      | 0.70 | 0.09                      | 0.68 | 0.15              | 29                |
| NO41                                   | 0.22                      | 0.88 | 0.24                      | 0.90 | 0.28              | 28                |
| PL02                                   | 0.98                      | 0.57 | 1.53                      | 0.55 | 1.29              | 29                |
| PL04                                   | 0.50                      | 0.76 | 0.73                      | 0.77 | 0.81              | 29                |
| PL05                                   | 0.54                      | 0.58 | 0.77                      | 0.61 | 0.42              | 29                |
| RU16                                   | 0.32                      | 0.80 | 0.52                      | 0.71 | 0.12              | 23                |
| RU18                                   | 0.75                      | 0.62 | 0.70                      | 0.58 | 0.26              | 29                |
| SE02                                   | 0.40                      | 0.64 | 0.57                      | 0.68 | 0.91              | 28                |
| SK04                                   | 1.46                      | 0.74 | 1.67                      | 0.79 | 0.74              | 29                |
| SK05                                   | 1.43                      | 0.80 | 1.63                      | 0.80 | 0.72              | 29                |
| TR01                                   | 1.08                      | 0.56 | 1.30                      | 0.55 | 0.50              | 26                |
| Average                                | 0.62                      | 0.75 | 0.74                      | 0.74 | 0.63              |                   |



Table S11b. Monthly mean of  $\text{SO}_4^-$  by  $S_{\text{EMEP}}$ ,  $S_{\text{AERO}}$  and measurement data, together with the temporal correlation coefficient and the number of measurements for December 2000.

| <b>SO<sub>4</sub> ppb</b><br>Station<br>name | <b>DECEMBER</b>           |      |                           |      |           |                   |
|----------------------------------------------|---------------------------|------|---------------------------|------|-----------|-------------------|
|                                              | $S_{\text{EMEP}}$<br>mean | r    | $S_{\text{AERO}}$<br>mean | r    | EMEP data | #<br>measurements |
| CH02                                         | 0.66                      | 0.68 | 0.75                      | 0.60 | 0.42      | 30                |
| ES04                                         | 0.23                      | 0.61 | 0.27                      | 0.61 | 0.39      | 27                |
| ES09                                         | 0.17                      | 0.59 | 0.17                      | 0.56 | 0.26      | 30                |
| ES12                                         | 0.20                      | 0.54 | 0.20                      | 0.62 | 0.29      | 29                |
| ES13                                         | 0.18                      | 0.78 | 0.17                      | 0.76 | 0.22      | 27                |
| ES15                                         | 0.17                      | 0.53 | 0.15                      | 0.56 | 0.28      | 19                |
| FR03                                         | 0.21                      | 0.60 | 0.17                      | 0.63 | 0.21      | 18                |
| FR05                                         | 0.18                      | 0.55 | 0.16                      | 0.58 | 0.47      | 30                |
| FR09                                         | 0.41                      | 0.60 | 0.33                      | 0.78 | 0.43      | 27                |
| FR10                                         | 0.19                      | 0.59 | 0.15                      | 0.54 | 0.24      | 30                |
| FR13                                         | 0.32                      | 0.59 | 0.26                      | 0.52 | 0.20      | 30                |
| GB07                                         | 0.14                      | 0.88 | 0.42                      | 0.65 | 0.44      | 23                |
| GB13                                         | 0.15                      | 0.90 | 0.14                      | 0.86 | 0.37      | 29                |
| GB14                                         | 0.13                      | 0.78 | 0.17                      | 0.85 | 0.43      | 25                |
| GB15                                         | 0.05                      | 0.69 | 0.07                      | 0.81 | 0.11      | 30                |
| HU02                                         | 0.71                      | 0.69 | 1.00                      | 0.61 | 1.45      | 30                |
| IT01                                         | 0.66                      | 0.54 | 0.76                      | 0.58 | 0.58      | 30                |
| LT15                                         | 0.21                      | 0.63 | 0.20                      | 0.52 | 0.93      | 30                |
| NL10                                         | 0.70                      | 0.70 | 0.55                      | 0.80 | 0.53      | 30                |
| NO08                                         | 0.07                      | 0.57 | 0.05                      | 0.81 | 0.18      | 30                |
| PL02                                         | 0.62                      | 0.71 | 0.60                      | 0.71 | 1.44      | 30                |
| PL04                                         | 0.26                      | 0.59 | 0.38                      | 0.53 | 1.72      | 30                |
| PL05                                         | 0.31                      | 0.55 | 0.32                      | 0.53 | 1.06      | 29                |
| Average                                      | 0.30                      | 0.65 | 0.32                      | 0.65 | 0.55      |                   |

Table S12. Monthly mean of  $\text{NO}_3^-$  by  $S_{\text{EMEP}}$ ,  $S_{\text{AERO}}$  and measurement data, together with the temporal correlation coefficient and the number of measurements for December 2000.

| <b>NO<sub>3</sub><sup>-</sup> ppb</b><br>Station<br>name | <b>December</b>           |      |                           |      |           |                   |
|----------------------------------------------------------|---------------------------|------|---------------------------|------|-----------|-------------------|
|                                                          | $S_{\text{EMEP}}$<br>mean | r    | $S_{\text{AERO}}$<br>mean | r    | EMEP data | #<br>measurements |
| IT01                                                     | 1.46                      | 0.51 | 1.98                      | 0.60 | 1.48      | 30                |
| NL09                                                     | 1.69                      | 0.68 | 2.07                      | 0.70 | 1.05      | 27                |
| NL10                                                     | 2.11                      | 0.89 | 2.30                      | 0.87 | 1.23      | 30                |
| PL02                                                     | 2.70                      | 0.91 | 2.59                      | 0.91 | 1.71      | 30                |
| PL04                                                     | 1.68                      | 0.72 | 2.24                      | 0.65 | 1.41      | 28                |
| RU18                                                     | 0.41                      | 0.58 | 1.13                      | 0.60 | 0.40      | 28                |
| Average                                                  | 1.68                      | 0.72 | 2.05                      | 0.72 | 1.21      |                   |

Table S13a. Monthly mean of  $\text{NH}_3 + \text{NH}_4^+$  (total ammonium) by  $S_{\text{EMEP}}$ ,  $S_{\text{AERO}}$  and measurement data, together with the temporal correlation coefficient and the number of measurements for June 2000.

| <b>NH<sub>3</sub>+NH<sub>4</sub><sup>+</sup><br/>ppb</b><br>Station<br>name | <b>JUNE</b>               |      |                           |      |           |                   |
|-----------------------------------------------------------------------------|---------------------------|------|---------------------------|------|-----------|-------------------|
|                                                                             | $S_{\text{EMEP}}$<br>mean | r    | $S_{\text{AERO}}$<br>mean | r    | EMEP data | #<br>measurements |
| AT02                                                                        | 5.79                      | 0.78 | 10.81                     | 0.77 | 4.20      | 29                |
| CH05                                                                        | 8.73                      | 0.58 | 12.37                     | 0.55 | 4.99      | 27                |
| DK03                                                                        | 1.90                      | 0.59 | 9.67                      | 0.67 | 3.01      | 14                |
| ES01                                                                        | 2.51                      | 0.63 | 4.82                      | 0.56 | 2.47      | 17                |
| ES09                                                                        | 1.75                      | 0.60 | 2.75                      | 0.56 | 0.49      | 29                |
| ES11                                                                        | 3.48                      | 0.54 | 6.28                      | 0.53 | 2.89      | 29                |
| ES12                                                                        | 2.46                      | 0.81 | 2.74                      | 0.70 | 4.59      | 29                |
| FI09                                                                        | 0.55                      | 0.65 | 0.86                      | 0.69 | 0.81      | 29                |
| FI37                                                                        | 0.73                      | 0.91 | 0.84                      | 0.92 | 0.62      | 29                |
| GB02                                                                        | 1.90                      | 0.54 | 5.29                      | 0.59 | 1.36      | 29                |
| HU02                                                                        | 5.71                      | 0.77 | 12.19                     | 0.81 | 5.71      | 27                |
| LT15                                                                        | 1.10                      | 0.82 | 1.64                      | 0.80 | 1.80      | 28                |
| LV10                                                                        | 0.82                      | 0.79 | 1.47                      | 0.81 | 1.76      | 29                |
| LV16                                                                        | 0.95                      | 0.60 | 1.23                      | 0.57 | 1.14      | 29                |
| NO01                                                                        | 0.57                      | 0.95 | 0.96                      | 0.93 | 0.79      | 29                |
| NO08                                                                        | 0.64                      | 0.69 | 0.74                      | 0.63 | 2.52      | 29                |
| NO41                                                                        | 0.45                      | 0.87 | 0.45                      | 0.86 | 0.56      | 28                |
| PL02                                                                        | 4.47                      | 0.83 | 9.63                      | 0.77 | 3.09      | 29                |
| PL04                                                                        | 1.24                      | 0.85 | 5.15                      | 0.76 | 2.58      | 29                |
| SE02                                                                        | 1.00                      | 0.67 | 2.17                      | 0.72 | 1.91      | 28                |
| Average                                                                     | 2.34                      | 0.72 | 4.16                      | 0.71 | 2.36      |                   |

Table S13b. Monthly mean of  $\text{NH}_3 + \text{NH}_4^+$  (total ammonium) by  $S_{\text{EMEP}}$ ,  $S_{\text{AERO}}$  and measurement data, together with the temporal correlation coefficient and the number of measurements for December 2000.

| Station name | $\text{NH}_3 + \text{NH}_4^+$ ppb |      |                        |      |           |                |
|--------------|-----------------------------------|------|------------------------|------|-----------|----------------|
|              | December                          |      |                        |      |           |                |
|              | $S_{\text{EMEP}}$ mean            | r    | $S_{\text{AERO}}$ mean | r    | EMEP data | # measurements |
| DK03         | 3.32                              | 0.59 | 5.28                   | 0.65 | 3.51      | 30             |
| ES04         | 1.52                              | 0.55 | 3.14                   | 0.59 | 4.55      | 30             |
| ES10         | 2.93                              | 0.65 | 2.00                   | 0.50 | 2.46      | 26             |
| ES12         | 0.94                              | 0.73 | 1.10                   | 0.51 | 1.76      | 29             |
| ES13         | 1.12                              | 0.57 | 1.75                   | 0.57 | 0.70      | 30             |
| FI09         | 0.48                              | 0.70 | 0.57                   | 0.71 | 0.80      | 30             |
| HU02         | 6.37                              | 0.70 | 8.68                   | 0.65 | 5.63      | 30             |
| LT15         | 1.56                              | 0.62 | 1.53                   | 0.65 | 4.96      | 30             |
| LV10         | 1.07                              | 0.66 | 1.08                   | 0.68 | 2.07      | 30             |
| PL02         | 4.95                              | 0.86 | 5.50                   | 0.81 | 6.75      | 30             |
| PL05         | 3.00                              | 0.73 | 2.85                   | 0.78 | 2.52      | 29             |
| SE02         | 1.26                              | 0.74 | 1.53                   | 0.69 | 1.35      | 30             |
| Average      | 2.38                              | 0.68 | 2.92                   | 0.65 | 3.09      |                |

Table S14a. Monthly mean BC concentrations calculated by  $S_{\text{EMEP}}$  and  $S_{\text{AERO}}$ , together with EMEP measurement data for December 2002 and June 2003.

| Station name | Dec 2002 mean <sup>1)</sup>                        | $S_{\text{EMEP}}$ 2000 Dec               | $S_{\text{AERO}}$ 2000 Dec               | June 2003 mean <sup>1)</sup>                       | $S_{\text{EMEP}}$ 2000 June              | $S_{\text{AERO}}$ 2000 June              |
|--------------|----------------------------------------------------|------------------------------------------|------------------------------------------|----------------------------------------------------|------------------------------------------|------------------------------------------|
|              | EMEP BC measurements mean $\mu\text{g}/\text{m}^3$ | BC $\mu\text{g}/\text{m}^3$ monthly mean | BC $\mu\text{g}/\text{m}^3$ monthly mean | EMEP BC measurements mean $\mu\text{g}/\text{m}^3$ | BC $\mu\text{g}/\text{m}^3$ monthly mean | BC $\mu\text{g}/\text{m}^3$ monthly mean |
| AT02         | 1.00                                               | 0.84                                     | 0.71                                     | 0.72                                               | 0.57                                     | 0.77                                     |
| CZ03         | 1.50                                               | 0.76                                     | 0.68                                     | 1.20                                               | 0.39                                     | 0.66                                     |
| DE02         | 1.24                                               | 0.51                                     | 0.68                                     | 0.33                                               | 0.33                                     | 0.56                                     |
| FI17         | 0.42                                               | 0.21                                     | 0.11                                     | 0.20                                               | 0.17                                     | 0.19                                     |
| IT04         | 3.74                                               | 1.42                                     | 2.17                                     | 1.05                                               | 0.62                                     | 1.37                                     |
| NL09         | 1.33                                               | 0.32                                     | 0.47                                     | 0.41                                               | 0.21                                     | 0.47                                     |
| PT01         | 0.78                                               | 0.14                                     | 0.10                                     | 1.10                                               | 0.20                                     | 0.16                                     |
| SE12         | 0.29                                               | 0.14                                     | 0.13                                     | 0.15                                               | 0.15                                     | 0.16                                     |
| SK04         | 0.92                                               | 0.32                                     | 0.14                                     | 0.62                                               | 0.23                                     | 0.27                                     |
| Average      | 1.25                                               | 0.47                                     | 0.51                                     | 0.64                                               | 0.30                                     | 0.47                                     |

Table S15. Monthly mean POM concentrations calculated by  $S_{EMEP}$  and  $S_{AERO}$ , together with EMEP measurement data for December 2002 and June 2003.

| Station name | Dec 2002 mean <sup>1)</sup><br>EMEP POM measurements mean $\mu\text{g}/\text{m}^3$ | $S_{EMEP}$ 2000 Dec POM<br>$\mu\text{g}/\text{m}^3$ monthly mean | $S_{AERO}$ 2000 Dec POM<br>$\mu\text{g}/\text{m}^3$ monthly mean | June 2003 mean <sup>1)</sup><br>EMEP POM measurements mean $\mu\text{g}/\text{m}^3$ | $S_{EMEP}$ 2000 June POM<br>$\mu\text{g}/\text{m}^3$ monthly mean | $S_{AERO}$ 2000 June POM<br>$\mu\text{g}/\text{m}^3$ monthly mean |
|--------------|------------------------------------------------------------------------------------|------------------------------------------------------------------|------------------------------------------------------------------|-------------------------------------------------------------------------------------|-------------------------------------------------------------------|-------------------------------------------------------------------|
| AT02         | 5.99                                                                               | 1.24                                                             | 2.28                                                             | 4.44                                                                                | 1.05                                                              | 3.78                                                              |
| CZ03         | 6.53                                                                               | 1.28                                                             | 1.70                                                             | 5.46                                                                                | 0.78                                                              | 2.38                                                              |
| DE02         | 7.94                                                                               | 0.77                                                             | 0.84                                                             | 3.61                                                                                | 1.52                                                              | 1.91                                                              |
| FI17         | 1.70                                                                               | 0.29                                                             | 0.32                                                             | 1.84                                                                                | 0.25                                                              | 1.47                                                              |
| IT04         | 16.01                                                                              | 1.44                                                             | 1.44                                                             | 4.37                                                                                | 0.70                                                              | 2.35                                                              |
| NL09         | 4.84                                                                               | 0.49                                                             | 0.58                                                             | 2.04                                                                                | 0.34                                                              | 0.67                                                              |
| PT01         | 4.39                                                                               | 0.19                                                             | 0.17                                                             | 4.23                                                                                | 0.32                                                              | 0.78                                                              |
| SE12         | 1.20                                                                               | 0.20                                                             | 0.30                                                             | 2.30                                                                                | 0.22                                                              | 0.72                                                              |
| SK04         | 3.04                                                                               | 0.47                                                             | 0.30                                                             | 3.72                                                                                | 0.39                                                              | 0.96                                                              |
| Average      | 5.74                                                                               | 0.71                                                             | 0.88                                                             | 4.85                                                                                | 0.62                                                              | 1.67                                                              |

<sup>1)</sup> Based on a few days of data available, which can differ for each station. Data from <http://www.nilu.no/projects/ccc/emepdata.html>

Table S16. Monthly mean AOD calculated by TM5 with the EMEP emission inventory and the AEROCOM emission inventory, together with the monthly mean AOD of the AERONET stations, June 2000. The number of observations by AERONET for the month June are given, together with the corresponding correlation coefficients.

| Name station  | Monthly mean + sdev AOD<br>$S_{EMEP}$ | r.    | Monthly mean + sdev AOD<br>$S_{AERO}$ | r.   | Monthly mean + sdev AOD<br>AERONET | # Observations |
|---------------|---------------------------------------|-------|---------------------------------------|------|------------------------------------|----------------|
| Moldova       | $0.18 \pm 0.17$                       | 0.27  | $0.18 \pm 0.15$                       | 0.25 | $0.18 \pm 0.11$                    | 958            |
| El-Arenosillo | $0.09 \pm 0.11$                       | 0.52  | $0.09 \pm 0.10$                       | 0.52 | $0.12 \pm 0.07$                    | 1165           |
| Ispra         | $0.19 \pm 0.31$                       | 0.35  | $0.22 \pm 0.27$                       | 0.41 | $0.34 \pm 0.28$                    | 539            |
| IMC_Oristano  | $0.15 \pm 0.08$                       | 0.17  | $0.14 \pm 0.07$                       | 0.18 | $0.15 \pm 0.08$                    | 1115           |
| Avignon       | $0.11 \pm 0.12$                       | 0.37  | $0.11 \pm 0.11$                       | 0.33 | $0.15 \pm 0.07$                    | 1058           |
| Hamburg       | $0.12 \pm 0.10$                       | 0.17  | $0.16 \pm 0.12$                       | 0.05 | $0.19 \pm 0.09$                    | 167            |
| Lille         | $0.11 \pm 0.11$                       | 0.03  | $0.12 \pm 0.10$                       | 0.01 | $0.19 \pm 0.08$                    | 261            |
| Palaiseau     | $0.15 \pm 0.11$                       | -0.04 | $0.15 \pm 0.09$                       | 0.07 | $0.14 \pm 0.10$                    | 151            |
| Venice        | $0.25 \pm 0.29$                       | 0.16  | $0.24 \pm 0.27$                       | 0.15 | $0.26 \pm 0.14$                    | 1056           |
| Average       | $0.15 \pm 0.16$                       | 0.22  | $0.16 \pm 0.14$                       | 0.22 | $0.19 \pm 0.11$                    |                |

Table S17. Monthly mean AOD by TM5 with the EMEP emission inventory and the AEROCOM emission inventory, together with the monthly mean AOD of the AERONET stations, December 2000. The number of observations by AERONET for the month December are given, together with the corresponding correlation coefficients.

| Name Station | Monthly mean + sdev AOD<br>$S_{EMEP}$ | r.    | Monthly mean + sdev AOD<br>$S_{AERO}$ | r.    | Monthly mean +sdev AOD<br>AERONET | # Observations |
|--------------|---------------------------------------|-------|---------------------------------------|-------|-----------------------------------|----------------|
| Lille        | $0.14 \pm 0.08$                       | -0.33 | $0.12 \pm 0.07$                       | -0.33 | $0.13 \pm 0.05$                   | 66             |
| Bucarest     | $0.08 \pm 0.05$                       | -0.38 | $0.08 \pm 0.05$                       | -0.38 | $0.10 \pm 0.06$                   | 113            |
| IMC_Oristano | $0.08 \pm 0.05$                       | -0.18 | $0.08 \pm 0.04$                       | -0.18 | $0.10 \pm 0.07$                   | 160            |
| Toulouse     | $0.06 \pm 0.03$                       | 0.34  | $0.06 \pm 0.03$                       | 0.28  | $0.13 \pm 0.05$                   | 103            |
| Venice       | $0.07 \pm 0.10$                       | 0.45  | $0.05 \pm 0.07$                       | 0.32  | $0.14 \pm 0.10$                   | 112            |
| Avignon      | $0.07 \pm 0.04$                       | 0.38  | $0.06 \pm 0.03$                       | 0.34  | $0.09 \pm 0.04$                   | 141            |
| Average      | $0.08 \pm 0.06$                       | 0.05  | $0.07 \pm 0.05$                       | 0.02  | $0.12 \pm 0.06$                   |                |

Table S18a and S18b. The monthly mean concentrations and corresponding standard deviation of aerosol precursor gases NH<sub>3</sub> and NO<sub>x</sub> at 14 EMEP stations for which the correlation coefficient for calculated NO<sub>x</sub> between S<sub>EMEP</sub> and S<sub>EMEP\_C</sub> in June is < 0.8, is presented. This allows us to select those stations for which the daily and weekly distribution of NO<sub>x</sub> emissions is large. For the comparison of NH<sub>3</sub> and the analysis for December we took the same stations.

(a)

| June         |                                | NH <sub>3</sub>                  |      | NO <sub>x</sub>               |                                 |      | EMEP data   |
|--------------|--------------------------------|----------------------------------|------|-------------------------------|---------------------------------|------|-------------|
| Station name | S <sub>EMEP</sub><br>ppb +sdev | S <sub>EMEP_C</sub><br>ppb +sdev | r    | S <sub>EMEP</sub><br>ppb+sdev | S <sub>EMEP_C</sub><br>ppb+sdev | r    |             |
| AT02         | 3.03 ± 1.25                    | 3.24 ± 1.62                      | 0.76 | 2.68 ± 0.53                   | 2.95 ± 0.64                     | 0.46 | 3.06 ± 0.83 |
| BE32         | 6.32 ± 3.79                    | 7.27 ± 5.04                      | 0.79 | 8.23 ± 2.52                   | 9.32 ± 3.42                     | 0.66 | 6.81 ± 3.03 |
| BE35         | 5.43 ± 2.97                    | 5.95 ± 3.60                      | 0.72 | 11.36 ± 3.68                  | 12.39 ± 4.53                    | 0.65 | 8.09 ± 2.27 |
| CH02         | 4.61 ± 2.14                    | 4.86 ± 2.50                      | 0.78 | 2.14 ± 0.46                   | 2.33 ± 0.53                     | 0.52 | 5.51 ± 1.98 |
| CH03         | 4.70 ± 2.63                    | 4.95 ± 2.84                      | 0.83 | 4.82 ± 1.29                   | 5.16 ± 1.37                     | 0.46 | 5.11 ± 1.46 |
| CH05         | 5.37 ± 2.72                    | 5.63 ± 3.01                      | 0.78 | 4.44 ± 1.12                   | 4.75 ± 1.24                     | 0.48 | 4.76 ± 1.34 |
| GB45         | 2.33 ± 1.27                    | 2.43 ± 1.16                      | 0.65 | 10.28 ± 6.01                  | 10.90 ± 5.62                    | 0.68 | 4.62 ± 1.84 |
| HU02         | 2.97 ± 1.24                    | 3.15 ± 1.40                      | 0.77 | 2.71 ± 0.53                   | 2.95 ± 0.64                     | 0.37 | 1.92 ± 0.97 |
| IT01         | 2.14 ± 1.08                    | 2.30 ± 1.26                      | 0.78 | 4.83 ± 1.00                   | 5.35 ± 1.06                     | 0.57 | 5.34 ± 1.28 |
| IT04         | 6.41 ± 2.44                    | 6.81 ± 2.81                      | 0.67 | 3.61 ± 0.42                   | 3.84 ± 0.54                     | 0.29 | 7.07 ± 2.22 |
| NL10         | 6.87 ± 4.17                    | 7.53 ± 4.94                      | 0.76 | 11.52 ± 3.85                  | 12.41 ± 4.39                    | 0.69 | 8.89 ± 2.86 |
| PL02         | 2.51 ± 1.27                    | 2.70 ± 1.68                      | 0.87 | 1.57 ± 0.35                   | 1.68 ± 0.40                     | 0.63 | 4.48 ± 1.50 |
| PL05         | 1.26 ± 0.83                    | 1.33 ± 0.97                      | 0.89 | 0.65 ± 0.10                   | 0.69 ± 0.26                     | 0.59 | 0.59 ± 0.18 |
| TR01         | 0.04 ± 0.06                    | 0.05 ± 0.09                      | 0.88 | 0.29 ± 0.10                   | 0.31 ± 0.15                     | 0.74 | 0.79 ± 0.49 |
| Average      | 3.84 ± 2.07                    | 3.99 ± 2.26                      | 0.78 | 4.85 ± 1.68                   | 5.11 ± 1.72                     | 0.56 | 4.71 ± 1.70 |

(b)

| Dec.         |                                | NH <sub>3</sub>                  |      | NO <sub>x</sub>                |                                  |      | EMEP data    |
|--------------|--------------------------------|----------------------------------|------|--------------------------------|----------------------------------|------|--------------|
| Station name | S <sub>EMEP</sub><br>ppb +sdev | S <sub>EMEP_C</sub><br>ppb +sdev | r    | S <sub>EMEP</sub><br>ppb +sdev | S <sub>EMEP_C</sub><br>ppb +sdev | r    |              |
| AT02         | 0.87 ± 0.56                    | 0.92 ± 0.59                      | 0.80 | 8.47 ± 3.91                    | 8.67 ± 3.92                      | 0.94 | 7.76 ± 3.25  |
| BE32         | 3.60 ± 3.01                    | 3.70 ± 3.03                      | 0.85 | 12.94 ± 11.49                  | 13.18 ± 11.28                    | 0.96 | 7.83 ± 5.81  |
| BE35         | 3.28 ± 2.69                    | 3.35 ± 2.63                      | 0.85 | 14.97 ± 13.16                  | 15.17 ± 12.96                    | 0.96 | 11.45 ± 5.35 |
| CH02         | 3.41 ± 2.24                    | 3.50 ± 2.10                      | 0.86 | 5.83 ± 3.43                    | 5.88 ± 3.30                      | 0.95 | 11.30 ± 4.63 |
| CH03         | 3.15 ± 2.20                    | 3.21 ± 2.01                      | 0.87 | 10.69 ± 6.57                   | 10.77 ± 6.23                     | 0.94 | 11.25 ± 3.90 |
| CH05         | 4.64 ± 2.84                    | 4.82 ± 2.74                      | 0.86 | 11.21 ± 6.31                   | 11.29 ± 6.02                     | 0.94 | 4.53 ± 3.53  |
| GB45         | 0.97 ± 0.83                    | 0.98 ± 0.73                      | 0.85 | 12.60 ± 11.58                  | 12.97 ± 12.00                    | 0.94 | 11.71 ± 7.30 |
| HU02         | 1.61 ± 0.95                    | 1.73 ± 1.10                      | 0.84 | 6.97 ± 2.91                    | 7.18 ± 2.94                      | 0.89 | 4.63 ± 1.50  |
| IT01         | 1.16 ± 0.83                    | 1.15 ± 0.60                      | 0.84 | 7.67 ± 3.95                    | 7.75 ± 3.74                      | 0.87 | 5.87 ± 1.72  |
| IT04         | 6.39 ± 3.00                    | 6.70 ± 3.13                      | 0.81 | 16.00 ± 7.17                   | 15.97 ± 6.98                     | 0.96 | 18.53 ± 6.92 |
| NL10         | 4.66 ± 4.15                    | 4.83 ± 4.47                      | 0.89 | 18.33 ± 15.77                  | 18.71 ± 16.22                    | 0.96 | 13.98 ± 5.80 |
| PL02         | 1.05 ± 0.88                    | 1.07 ± 0.94                      | 0.88 | 6.31 ± 3.64                    | 6.40 ± 3.68                      | 0.97 | 8.33 ± 3.33  |
| PL05         | 0.38 ± 0.28                    | 0.39 ± 0.24                      | 0.80 | 3.36 ± 1.87                    | 3.36 ± 1.84                      | 0.98 | 3.59 ± 1.86  |
| TR01         | 0.12 ± 0.13                    | 0.13 ± 0.13                      | 0.94 | 1.57 ± 1.01                    | 1.62 ± 1.03                      | 0.96 | 3.64 ± 3.23  |
| Average      | 2.60 ± 1.85                    | 2.54 ± 1.70                      | 0.85 | 9.37 ± 6.40                    | 9.36 ± 6.22                      | 0.94 | 8.53 ± 4.09  |

Table S19. Monthly mean and standard deviation for nitrate aerosol for the simulation with the daily and weekly temporal distribution ( $S_{EMEP}$ ) of emissions and without the daily and weekly temporal distribution ( $S_{EMEP\_C}$ ), together with the EMEP measurement data, for December (a) and June (b) 2000.

(a)

| <b>December NO<sub>3</sub> aerosol</b> |                                       |      |                                          |      |                                 |
|----------------------------------------|---------------------------------------|------|------------------------------------------|------|---------------------------------|
| Station name                           | Monthly mean $S_{EMEP}$<br>ppb + sdev | r    | Monthly mean $S_{EMEP\_C}$<br>ppb + sdev | r    | EMEP measurements<br>ppb + sdev |
| HU02                                   | 3.40 ± 2.02                           | 0.56 | 3.41 ± 1.98                              | 0.57 | 1.64 ± 1.02                     |
| IT01                                   | 1.46 ± 1.43                           | 0.51 | 1.52 ± 1.44                              | 0.52 | 1.48 ± 0.93                     |
| IT04                                   | 5.62 ± 1.05                           | 0.29 | 5.60 ± 1.05                              | 0.22 | 2.47 ± 2.19                     |
| LV10                                   | 0.61 ± 0.66                           | 0.03 | 0.61 ± 0.66                              | 0.03 | 0.50 ± 0.27                     |
| LV16                                   | 0.40 ± 0.32                           | 0.33 | 0.42 ± 0.33                              | 0.33 | 0.33 ± 0.21                     |
| NL09                                   | 1.69 ± 1.65                           | 0.68 | 1.75 ± 1.66                              | 0.69 | 1.05 ± 0.67                     |
| NL10                                   | 2.11 ± 1.74                           | 0.89 | 2.15 ± 1.70                              | 0.88 | 1.23 ± 0.78                     |
| NO08                                   | 0.19 ± 0.30                           | 0.45 | 0.19 ± 0.30                              | 0.44 | 0.20 ± 0.22                     |
| PL02                                   | 2.70 ± 2.14                           | 0.91 | 2.73 ± 2.11                              | 0.91 | 1.71 ± 1.24                     |
| PL03                                   | 0.11 ± 0.14                           | 0.30 | 0.12 ± 0.14                              | 0.34 | 0.21 ± 0.18                     |
| PL04                                   | 1.68 ± 1.30                           | 0.72 | 1.69 ± 1.32                              | 0.71 | 1.49 ± 0.86                     |
| RU16                                   | 0.19 ± 0.25                           | 0.23 | 0.18 ± 0.25                              | 0.23 | 0.71 ± 0.41                     |
| RU18                                   | 0.41 ± 0.62                           | 0.58 | 0.42 ± 0.63                              | 0.60 | 0.42 ± 0.27                     |
| SK02                                   | 0.05 ± 0.09                           | 0.02 | 0.05 ± 0.09                              | 0.02 | 0.13 ± 0.11                     |
| SK04                                   | 0.98 ± 0.57                           | 0.35 | 0.98 ± 0.57                              | 0.28 | 0.41 ± 0.23                     |
| SK05                                   | 0.75 ± 0.52                           | 0.34 | 0.75 ± 0.54                              | 0.34 | 0.88 ± 0.40                     |
| Average                                | 1.40 ± 0.93                           | 0.45 | 1.41 ± 0.92                              | 0.44 | 0.93 ± 0.62                     |

(b)

| <b>June NO<sub>3</sub> aerosol</b> |                                       |                                          |
|------------------------------------|---------------------------------------|------------------------------------------|
| Station name                       | Monthly mean $S_{EMEP}$<br>ppb + sdev | Monthly mean $S_{EMEP\_C}$<br>ppb + sdev |
| HU02                               | < 0.01                                | < 0.01                                   |
| IT01                               | 0.27 ± 0.36                           | 0.39 ± 0.50                              |
| IT04                               | 1.27 ± 1.00                           | 1.49 ± 1.05                              |
| LV10                               | < 0.01                                | < 0.01                                   |
| LV16                               | < 0.01                                | < 0.01                                   |
| NL09                               | 0.31 ± 0.61                           | 0.39 ± 0.80                              |
| NL10                               | 1.18 ± 1.42                           | 1.24 ± 1.44                              |
| NO08                               | < 0.01                                | 0.01 ± 0.02                              |
| PL02                               | < 0.01                                | 0.01 ± 0.01                              |
| PL03                               | 0.09 ± 0.12                           | 0.08 ± 0.11                              |
| PL04                               | 0.01 ± 0.02                           | 0.01 ± 0.02                              |
| RU16                               | < 0.01                                | < 0.01                                   |
| RU18                               | < 0.01                                | < 0.01                                   |
| SK02                               | 0.05 ± 0.10                           | 0.04 ± 0.09                              |
| SK04                               | 0.09 ± 0.16                           | 0.09 ± 0.15                              |
| SK05                               | 0.09 ± 0.15                           | 0.08 ± 0.14                              |

Table S20. Monthly mean and standard deviation for the simulation with seasonal temporal distribution ( $S_{\text{EMEP}_C}$ ) and without seasonal temporal distribution ( $S_{\text{EMEP}_C_{\text{annual}}}$ ) for  $\text{SO}_4^=$  (a) and BC (b), for June 2000. For BC we compare measurement data of June 2003 since BC data were not available for 2000.

(a)

| Station name | $\text{SO}_4^=$<br>$S_{\text{EMEP}_C}$<br>ppb + sdev | $\text{SO}_4^=$<br>$S_{\text{EMEP}_C_{\text{annual}}}$<br>ppb + sdev | EMEP<br>measurements<br>ppb + sdev |
|--------------|------------------------------------------------------|----------------------------------------------------------------------|------------------------------------|
| AT02         | 1.39 ± 1.24                                          | 1.67 ± 1.42                                                          | 0.92 ± 0.43                        |
| CH02         | 0.94 ± 0.87                                          | 1.07 ± 0.90                                                          | 0.66 ± 0.26                        |
| CH05         | 1.04 ± 0.97                                          | 1.16 ± 1.00                                                          | 0.74 ± 0.33                        |
| ES10         | 0.99 ± 0.57                                          | 1.06 ± 0.55                                                          | 1.41 ± 0.78                        |
| ES11         | 0.77 ± 0.46                                          | 0.77 ± 0.46                                                          | 0.97 ± 0.55                        |
| ES12         | 1.03 ± 0.54                                          | 1.05 ± 0.54                                                          | 1.31 ± 0.63                        |
| FI09         | 0.30 ± 0.25                                          | 0.32 ± 0.27                                                          | 0.39 ± 0.27                        |
| FI17         | 0.33 ± 0.29                                          | 0.37 ± 0.33                                                          | 0.43 ± 0.34                        |
| FI37         | 0.25 ± 0.22                                          | 0.27 ± 0.26                                                          | 0.30 ± 0.25                        |
| FR05         | 0.67 ± 0.41                                          | 0.71 ± 0.44                                                          | 0.87 ± 0.58                        |
| FR09         | 0.73 ± 0.42                                          | 0.80 ± 0.46                                                          | 0.86 ± 0.38                        |
| FR10         | 0.71 ± 0.55                                          | 0.80 ± 0.56                                                          | 0.57 ± 0.24                        |
| FR13         | 0.77 ± 0.54                                          | 0.82 ± 0.54                                                          | 0.71 ± 0.38                        |
| FR14         | 0.86 ± 0.74                                          | 0.98 ± 0.77                                                          | 0.62 ± 0.17                        |
| GB02         | 0.35 ± 0.32                                          | 0.37 ± 0.36                                                          | 0.45 ± 0.29                        |
| GB04         | 0.63 ± 0.35                                          | 0.66 ± 0.37                                                          | 0.83 ± 0.50                        |
| GB06         | 0.35 ± 0.41                                          | 0.36 ± 0.43                                                          | 0.42 ± 0.43                        |
| GB13         | 0.54 ± 0.35                                          | 0.58 ± 0.39                                                          | 0.61 ± 0.55                        |
| GB14         | 0.46 ± 0.38                                          | 0.49 ± 0.42                                                          | 0.62 ± 0.46                        |
| GB15         | 0.16 ± 0.19                                          | 0.17 ± 0.20                                                          | 0.23 ± 0.14                        |
| GB16         | 0.23 ± 0.27                                          | 0.24 ± 0.30                                                          | 0.35 ± 0.26                        |
| HU02         | 1.36 ± 0.79                                          | 1.70 ± 0.93                                                          | 1.05 ± 0.39                        |
| IE03         | 0.40 ± 0.44                                          | 0.42 ± 0.74                                                          | 0.36 ± 0.34                        |
| IE04         | 0.41 ± 0.42                                          | 0.44 ± 0.46                                                          | 0.27 ± 0.25                        |
| LT15         | 0.43 ± 0.40                                          | 0.49 ± 0.45                                                          | 0.48 ± 0.26                        |
| LV16         | 0.31 ± 0.28                                          | 0.36 ± 0.32                                                          | 0.16 ± 0.23                        |
| NL09         | 0.50 ± 0.41                                          | 0.53 ± 0.46                                                          | 0.51 ± 0.33                        |
| NL10         | 0.80 ± 0.42                                          | 0.86 ± 0.46                                                          | 0.55 ± 0.31                        |
| NO01         | 0.30 ± 0.41                                          | 0.32 ± 0.44                                                          | 0.51 ± 0.60                        |
| NO08         | 0.30 ± 0.43                                          | 0.32 ± 0.46                                                          | 0.43 ± 0.54                        |
| NO39         | 0.11 ± 0.10                                          | 0.11 ± 0.11                                                          | 0.15 ± 0.09                        |
| NO41         | 0.22 ± 0.36                                          | 0.24 ± 0.40                                                          | 0.28 ± 0.37                        |
| PL02         | 0.99 ± 0.76                                          | 1.27 ± 0.97                                                          | 1.26 ± 0.40                        |
| PL04         | 0.50 ± 0.52                                          | 0.56 ± 0.60                                                          | 0.81 ± 0.43                        |
| PL05         | 0.54 ± 0.42                                          | 0.64 ± 0.50                                                          | 0.42 ± 0.35                        |
| RU16         | 0.32 ± 0.28                                          | 0.36 ± 0.33                                                          | 0.12 ± 0.07                        |
| RU18         | 0.75 ± 0.31                                          | 0.88 ± 0.38                                                          | 0.26 ± 0.13                        |
| SE02         | 0.40 ± 0.44                                          | 0.43 ± 0.49                                                          | 0.91 ± 1.47                        |
| SK04         | 1.45 ± 1.00                                          | 1.76 ± 1.18                                                          | 0.74 ± 0.38                        |
| SK05         | 1.42 ± 1.05                                          | 1.71 ± 1.23                                                          | 0.72 ± 0.36                        |
| TR01         | 1.07 ± 1.06                                          | 1.24 ± 1.21                                                          | 0.50 ± 0.39                        |
| Average      | 0.64 ± 0.50                                          | 0.72 ± 0.56                                                          | 0.60 ± 0.39                        |



(b)

| Station name | BC<br>$S_{EMEP_c}$<br>$\mu\text{g}/\text{m}^3$ | BC<br>$S_{EMEP_c, \text{annual}}$<br>$\mu\text{g}/\text{m}^3$ | EMEP measurements<br>June 2003 $\mu\text{g}/\text{m}^3$ |
|--------------|------------------------------------------------|---------------------------------------------------------------|---------------------------------------------------------|
| AT02         | $0.58 \pm 0.32$                                | $0.77 \pm 0.42$                                               | 0.72                                                    |
| CZ03         | $0.41 \pm 0.24$                                | $0.62 \pm 0.38$                                               | 1.20                                                    |
| DE02         | $0.34 \pm 0.25$                                | $0.37 \pm 0.28$                                               | 0.33                                                    |
| FI17         | $0.17 \pm 0.11$                                | $0.21 \pm 0.15$                                               | 0.20                                                    |
| IT04         | $0.48 \pm 0.23$                                | $0.62 \pm 0.30$                                               | 1.05                                                    |
| NL09         | $0.22 \pm 0.35$                                | $0.25 \pm 0.41$                                               | 0.41                                                    |
| PT01         | $0.21 \pm 0.10$                                | $0.25 \pm 0.12$                                               | 1.10                                                    |
| SE12         | $0.15 \pm 0.13$                                | $0.17 \pm 0.15$                                               | 0.15                                                    |
| SK04         | $0.23 \pm 0.10$                                | $0.37 \pm 0.17$                                               | 0.62                                                    |
| Average      | $0.31 \pm 0.20$                                | $0.40 \pm 0.26$                                               | 0.64                                                    |

(c)

| Station name | POM<br>$S_{EMEP_c}$<br>$\mu\text{g}/\text{m}^3$ | POM<br>$S_{EMEP_c, \text{annual}}$<br>$\mu\text{g}/\text{m}^3$ | OC EMEP<br>measurements June<br>2003 $\mu\text{g}/\text{m}^3$ |
|--------------|-------------------------------------------------|----------------------------------------------------------------|---------------------------------------------------------------|
| AT02         | $1.06 \pm 0.56$                                 | $1.32 \pm 0.69$                                                | 4.44                                                          |
| CZ03         | $0.79 \pm 0.83$                                 | $1.10 \pm 0.99$                                                | 5.46                                                          |
| DE02         | $1.53 \pm 1.19$                                 | $1.58 \pm 1.22$                                                | 3.61                                                          |
| FI17         | $0.26 \pm 0.17$                                 | $0.32 \pm 0.22$                                                | 1.84                                                          |
| IT04         | $0.71 \pm 0.33$                                 | $0.90 \pm 0.42$                                                | 16.01                                                         |
| NL09         | $0.35 \pm 0.58$                                 | $0.39 \pm 0.66$                                                | 2.04                                                          |
| PT01         | $0.33 \pm 0.16$                                 | $0.40 \pm 0.19$                                                | 4.23                                                          |
| SE12         | $0.23 \pm 0.20$                                 | $0.25 \pm 0.23$                                                | 2.30                                                          |
| SK04         | $0.39 \pm 0.18$                                 | $0.59 \pm 0.28$                                                | 3.72                                                          |
| Average      | $0.63 \pm 0.47$                                 | $0.76 \pm 0.54$                                                | 4.85                                                          |

Table 21. Monthly mean AOD values for  $S_{\text{EMEP}_C}$  and  $S_{\text{EMEP}_C_{\text{annual}}}$  together with the monthly mean AERONET AOD values, for June 2000.

| Name station  | Monthly mean +<br>sdev AOD<br>$S_{\text{EMEP}_C}$ | r.   | Monthly mean +<br>sdev AOD<br>$S_{\text{EMEP}_C_{\text{annual}}}$ | r.   | Monthly mean +<br>sdev AOD<br>AERONET |
|---------------|---------------------------------------------------|------|-------------------------------------------------------------------|------|---------------------------------------|
| Moldova       | $0.18 \pm 0.16$                                   | 0.27 | $0.20 \pm 0.18$                                                   | 0.29 | $0.18 \pm 0.11$                       |
| El-Arenosillo | $0.09 \pm 0.10$                                   | 0.52 | $0.09 \pm 0.10$                                                   | 0.51 | $0.12 \pm 0.07$                       |
| Ispra         | $0.20 \pm 0.30$                                   | 0.34 | $0.21 \pm 0.31$                                                   | 0.34 | $0.34 \pm 0.28$                       |
| IMC_Oristano  | $0.15 \pm 0.08$                                   | 0.17 | $0.15 \pm 0.08$                                                   | 0.16 | $0.15 \pm 0.08$                       |
| Avignon       | $0.10 \pm 0.12$                                   | 0.36 | $0.11 \pm 0.12$                                                   | 0.35 | $0.15 \pm 0.07$                       |
| Hamburg       | $0.12 \pm 0.10$                                   | 0.14 | $0.13 \pm 0.10$                                                   | 0.16 | $0.19 \pm 0.09$                       |
| Lille         | $0.11 \pm 0.10$                                   | 0.02 | $0.12 \pm 0.11$                                                   | 0.02 | $0.19 \pm 0.08$                       |
| Palaiseau     | $0.15 \pm 0.10$                                   | 0.03 | $0.16 \pm 0.11$                                                   | 0.01 | $0.14 \pm 0.10$                       |
| Venice        | $0.25 \pm 0.28$                                   | 0.16 | $0.26 \pm 0.29$                                                   | 0.29 | $0.26 \pm 0.14$                       |
| Average       | $0.15 \pm 0.15$                                   | 0.22 | $0.16 \pm 0.16$                                                   | 0.23 | $0.19 \pm 0.11$                       |
